# Supplementary material for: Population structure and genetic history of Tibetan Terriers
Source: Genet Sel Evol. 2019 Dec 27;51:79. doi: 10.1186/s12711-019-0520-4 (PMC6935067; doi:10.1186/s12711-019-0520-4)
Supplement: Supplementary file 2 — Additional file 2: Table S1. Breeds and number of dogs included in the analyses. The breeds and number of dogs per breed, used in this study are listed. [file 12711_2019_520_MOESM2_ESM.xlsx]

## Sheet: NJ_tree
1	Afghan_Hound	11
2	Airedale_Terrier	13
3	Akita	12
4	Alaskan_Malamute	12
5	American_Eskimo_Dog	6
6	American_Pit_Bull_Terrier	6
7	American_Staffordshire_Terrier	5
8	Australian_Cattle_Dog	9
9	Australian_Shepherd	19
10	Basenji	19
11	Basset_Hound	19
12	Beagle	19
13	Bearded_Collie	4
14	Bedlington_Terrier	3
15	Belgian_Malinois	6
16	Belgian_Sheepdog	5
17	Belgian_Tervuren	19
18	Berger_Picard	1
19	Bernese_Mountain_Dog	19
20	Bichon_Frise	19
21	Bloodhound	7
22	Boerboel	3
23	Border_Collie	19
24	Border_Terrier	19
25	Borzoi	12
26	Boston_Terrier	19
27	Bouvier_Des_Flandres	8
28	Boxer	19
29	Briard	1
30	Brittany	19
31	Brussels_Griffon	2
32	Bull_Terrier	19
33	Bullmastiff	11
34	Cairn_Terrier	19
35	Canaan_Dog	11
36	Cane_Corso	9
37	Cardigan_Welsh_Corgi	4
38	Carolina_Dog	4
39	Catahoula_Leopard_Dog	4
40	Caucasian_Ovcharka	1
41	Cavalier_King_Charles_Spaniel	19
42	Chesapeake_Bay_Retriever	12
43	Chihuahua	14
44	Chinese_Crested	13
45	Chinese_Shar-pei	19
46	Chinook	12
47	Chow_Chow	6
48	Cocker_Spaniel	19
49	Collie	10
50	Coton_De_Tulear	2
51	Croatian_Shepherd	3
52	Curly-Coated_Retriever	2
53	Dachshund	19
54	Dalmatian	19
55	Dandie_Dinmont_Terrier	1
56	Doberman_Pinscher	19
57	Dogue_De_Bordeaux	3
58	Elkhound	12
59	English_Bulldog	19
60	English_Cocker_Spaniel	19
61	English_Setter	19
62	English_Springer_Spaniel	19
63	English_Toy_Spaniel	1
64	Eurasier	12
65	Finnish_Spitz	12
66	Flat-Coated_Retriever	5
67	Fox_Terrier_Wire	12
68	French_Bulldog	19
69	German_Shepherd_Dog	19
70	German_Shorthaired_Pointer	12
71	German_Wirehaired_Pointer	2
72	Giant_Schnauzer	6
73	Golden_Retriever	19
74	Gordon_Setter	19
75	Gray_Wolf	14
76	Great_Dane	19
77	Great_Pyrenees	10
78	Greater_Swiss_Mountain_Dog	10
79	Greenland_Sledge_Dog	12
80	Greyhound	19
81	Havanese	19
82	Ibizan_Hound	1
83	Icelandic_Sheepdog	2
84	Irish_Setter	12
85	Irish_Water_Spaniel	1
86	Irish_Wolfhound	19
87	Istrian_Shorthaired_Hound	4
88	Italian_Greyhound	6
89	Jack_Russell_Terrier	19
90	Japanese_Chin	4
91	Keeshond	11
92	Kerry_Blue_Terrier	2
93	Komondor	2
94	Labrador_Retriever	19
95	Large_Munsterlander	1
96	Leonberger	13
97	Lhasa_Apso	15
98	Maltese	19
99	Mastiff	19
100	Minature_Poodle	8
101	Miniature_Dachshund	8
102	Miniature_Pinscher	18
103	Miniature_Schnauzer	19
104	Neapolitan_Mastiff	6
105	New_Guinea_Singing_Dog	5
106	Newfoundland	19
107	Norfolk_Terrier	19
108	Norwich_Terrier	3
109	Nova_Scotia_Duck_Tolling_Retriever	19
110	Old_English_Sheepdog	9
111	Otterhound	12
112	Papillon	19
113	Pekingese	13
114	Pembroke_Welsh_Corgi	14
115	Perdiguero	1
116	Peruvian_Inca_Orchid	13
117	Pharaoh_Hound	2
118	Pomeranian	16
119	Poodle	19
120	Portuguese_Podengo	1
121	Portuguese_Water_Dog	9
122	Posavski_Goni	3
123	Pug	18
124	Puli	2
125	Pyrenean_Shepherd	1
126	Rat_Terrier	7
127	Redbone_Coonhound	2
128	Rhodesian_Ridgeback	10
129	Rottweiler	19
130	Saint_Bernard	19
131	Saluki	7
132	Samoyed	10
133	Schipperke	19
134	Scottish_Deerhound	1
135	Scottish_Terrier	19
136	Shetland_Sheepdog	19
137	Shiba_Inu	8
138	Shih_Tzu	19
139	Shiloh_Shepherd	1
140	Siberian_Husky	17
141	Silky_Terrier	5
142	Small_Munsterlander	1
143	Soft_Coated_Wheaten_Terrier	10
144	Spinone_Italiano	2
145	Stabyhoun	1
146	Staffordshire_Bull_Terrier	13
147	Standard_Schnauzer	4
148	Taiwanese_Mountain_Dog	1
149	Tibetan_Mastiff	1
150	Tibetan_Spaniel	19
151	Tibetan_Terrier	7
152	Tibetan_terrier_F1	5
153	Tibetan_terrier_LA	5
154	Tibetan_terrier_LU	1
155	Tibetan_terrier_NA	7
156	Tornjak	1
157	Toy_Fox_Terrier	4
158	Toy_Manchester_Terrier	2
159	Toy_Poodle	16
160	Vizsla	19
161	Weimaraner	19
162	West_Highland_White_Terrier	19
163	Whippet	6
164	Wirehaired_Pointing_Griffon	12
165	Xoloitzcuintli	15
166	Yorkshire_Terrier	19
		1793
